# Supplementary material for: Microfluidic synthesis of ultra-small magnetic nanohybrids for enhanced magnetic resonance imaging
Source: Royal Society of Chemistry journal article supplement (doi:10.1039/c5tc02279g), 2015-01-01
Supplement: c5tc02279g1.pdf [file c5tc02279g1.pdf]

**Supplementary Information for**  
**Microfluidic synthesis of Ultra-small Magnetic Nanohybrids for**  
**Enhanced Magnetic Resonance Imaging**

Junmei Wang<sup>1§</sup>, Kai Zhao<sup>2§</sup>, Xiaomiao Shen<sup>1§</sup>, Weiwei Zhang<sup>1</sup>, Shaoxia Ji<sup>1</sup>, Yujun Song<sup>1\*</sup>, Xiaodong Zhang<sup>2</sup>, Rong Rong<sup>2</sup>, Xiaoying Wang<sup>2\*</sup>

<sup>1</sup> Department of Physics, Center for Modern Physics, Engineering Center for Weak Magnetic Detection Beijing, School of Mathematics and Physics, University of Science & Technology Beijing, Beijing 100083, China; <sup>2</sup> Department of Radiology, Peiking University First Hospital, Beijing 100034, China

\* Corresponding authors: Y.S., [songyj@ustb.edu.cn](mailto:songyj@ustb.edu.cn); X.W., [cjr.wangxiaoying@vip.163.com](mailto:cjr.wangxiaoying@vip.163.com).

§ Contribute to this article equally.

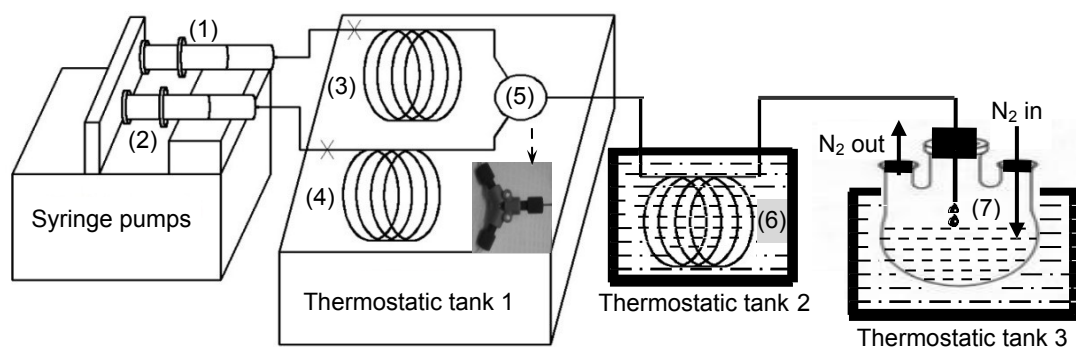

**Figure s1** Experiment setup of the simple programmed microfluidic and rapid batch-cooling process: (1) and (2), syringe pumps for the reducing-agent solution and metal-salt solution; (3) and (4), microtubing coils for pre-heating reducing-agent solution and metal-salt solution with the temperature controlled by thermostatic tank 1; (5), three-way mixer for reaction between reducing-agent solution and metal-salt solution; (6), microtubing coil for nucleation and nanoparticle growth with temperature controlled by thermostatic tank 2; (7), nanoparticle collector with temperature controlled by thermostatic tank 3, where the growth is terminated at a designed temperature (e.g., -15~10°C).

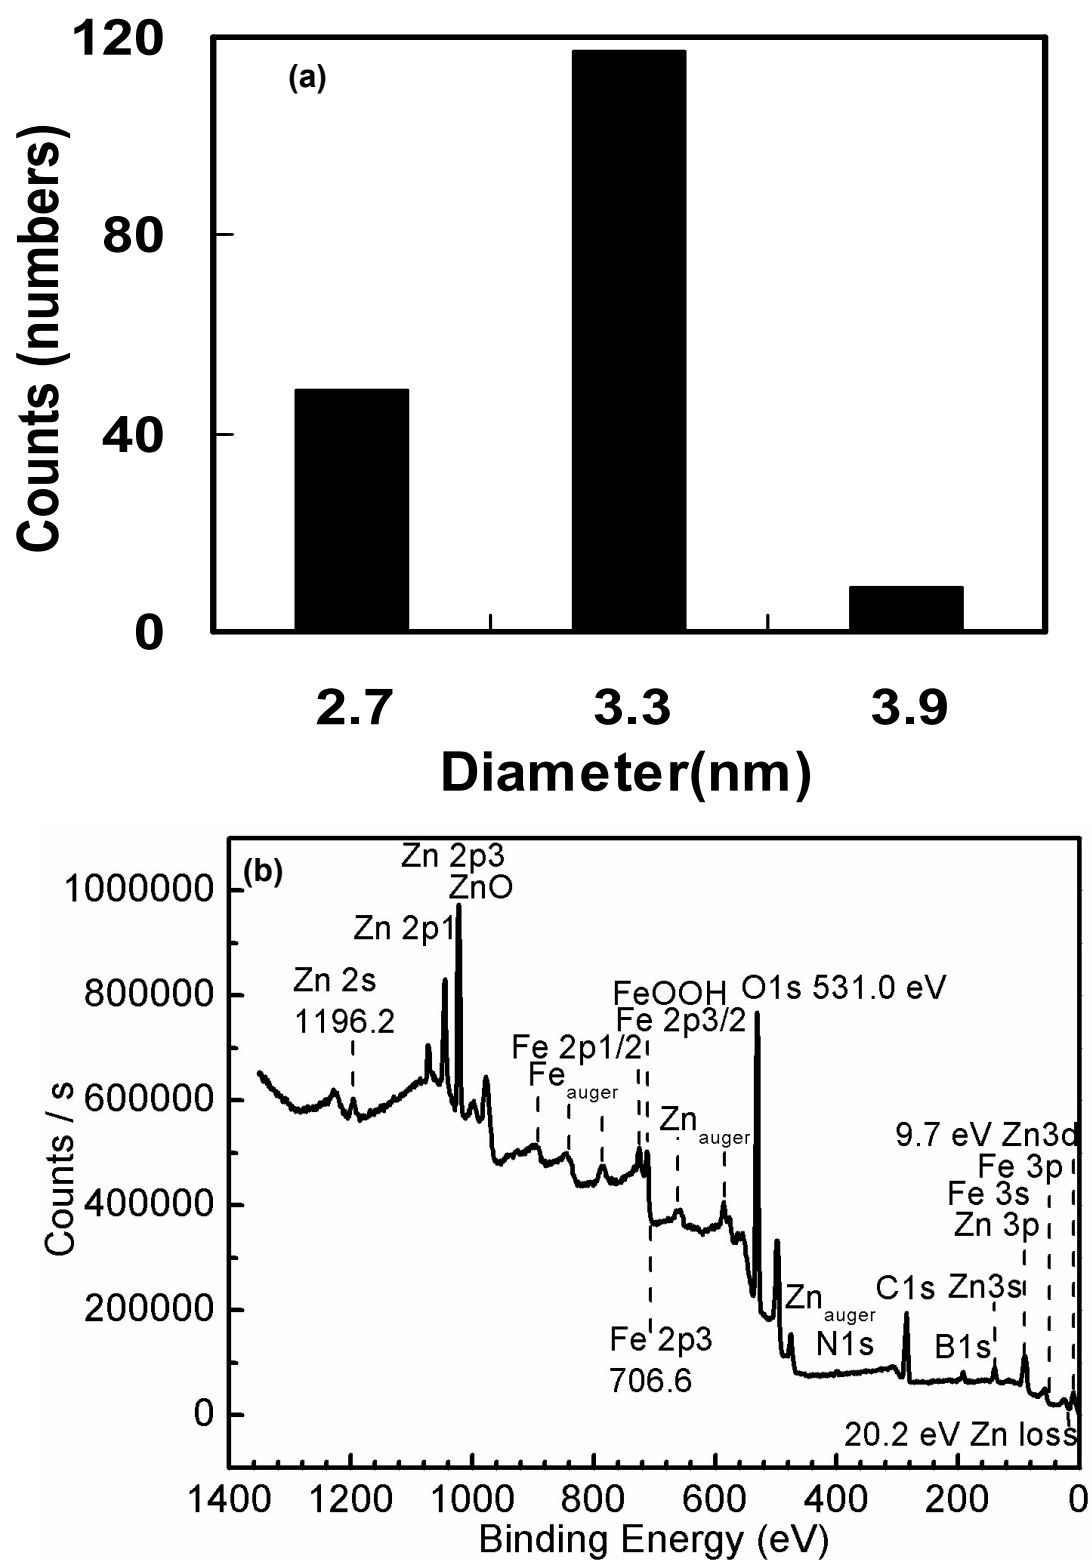

**Figure s2** Histogram of size distribution (a) and XPS (b) of  $\text{Fe}_{(1-x)}\text{Zn}_x@Zn_{(1-y)}\text{Fe}_y\text{O}-(\text{OH})_z$  nanohybrids.

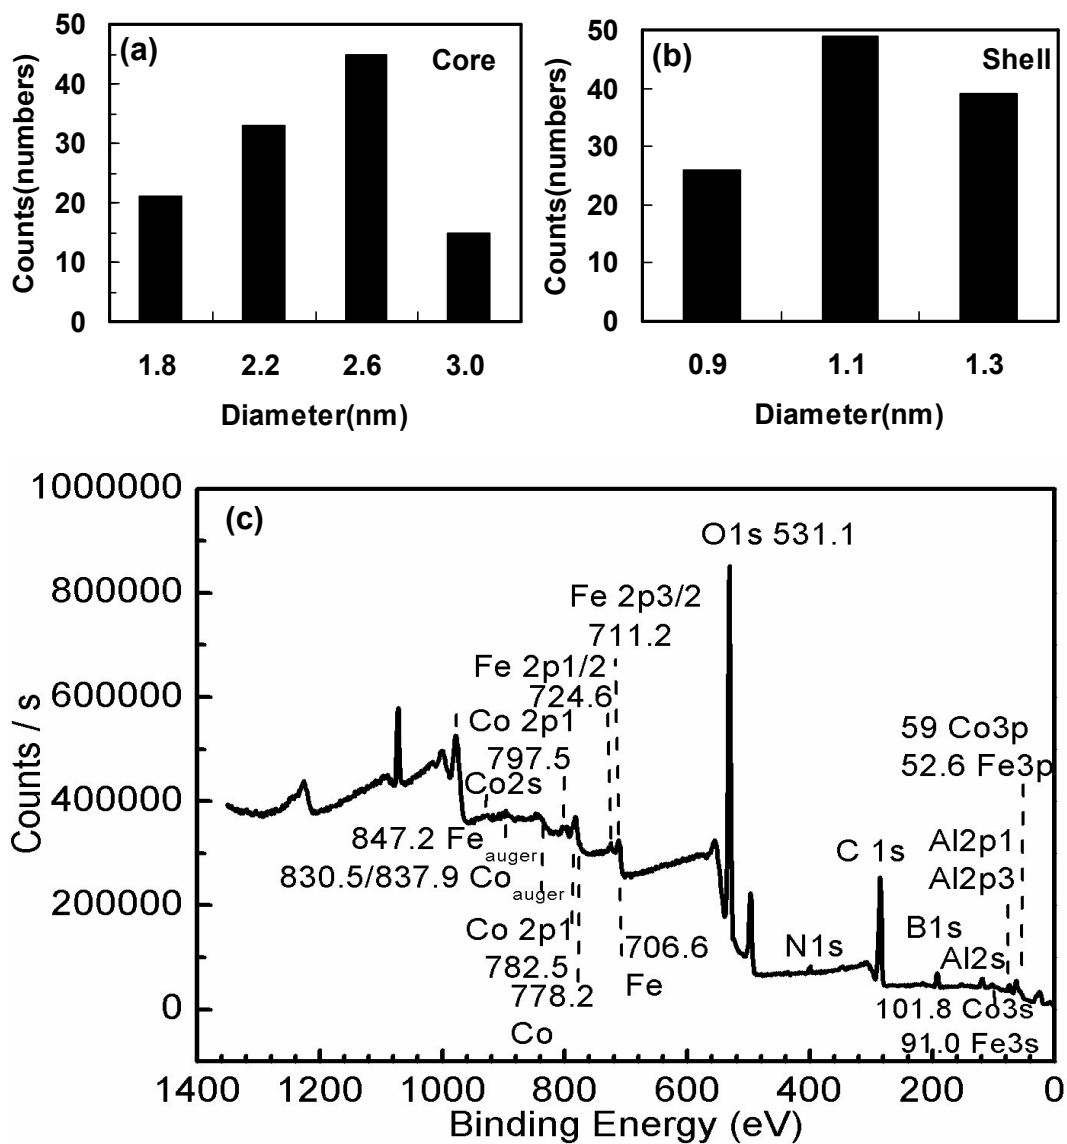

**Figure s3** Histogram of size distribution (a: core; b: shell) and XPS (c) of  $(\text{CoFe})_{(1-x)}\text{Al}_x@Al_{(1-y)}(\text{CoFe}_y\text{O}-(\text{OH})_z$  nanohybrids.

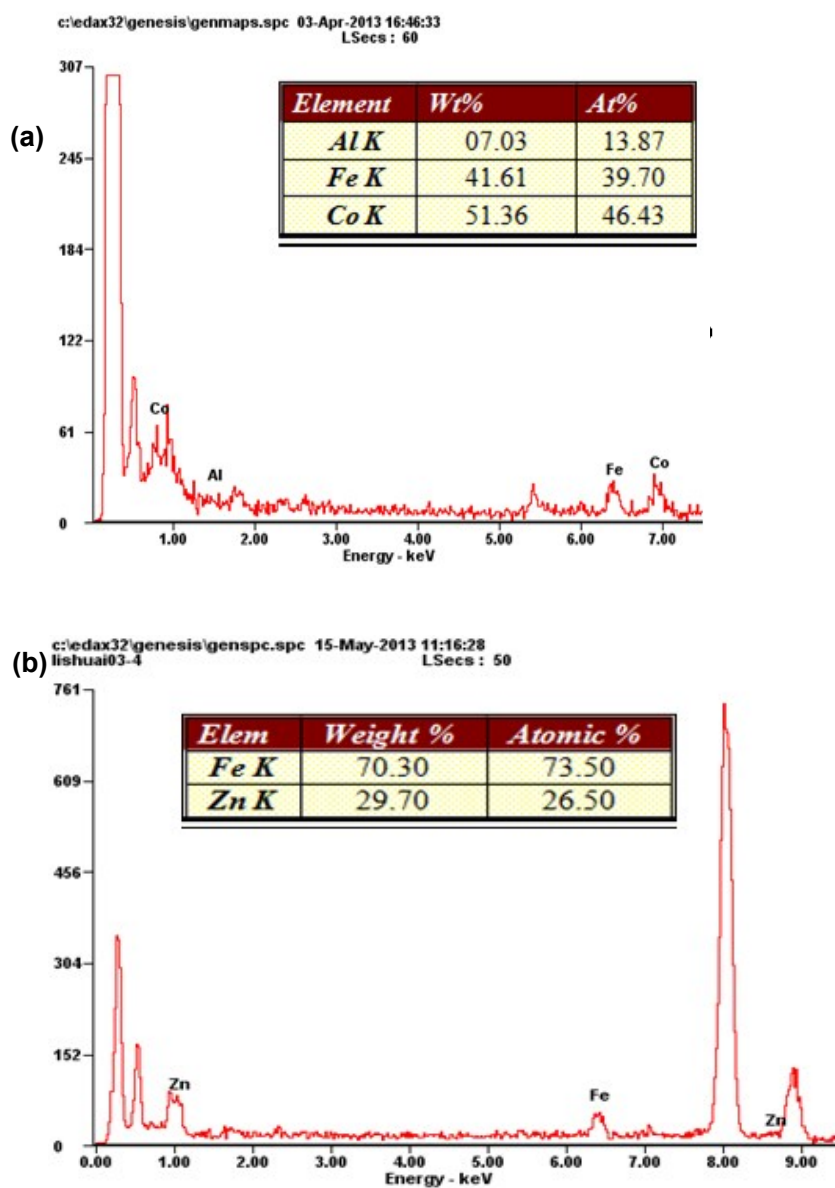

**Figure s4** Metal ratios in  $(\text{CoFe})_{(1-x)}\text{Al}_x@(\text{Al})_{(1-y)}(\text{CoFe})_y\text{O}-(\text{OH})_z$  nanohybrids (a) and  $\text{Fe}_{(1-x)}\text{Zn}_x@(\text{Zn})_{(1-y)}\text{Fe}_y\text{O}-(\text{OH})_z$  nanohybrids (b) by EDS analysis.

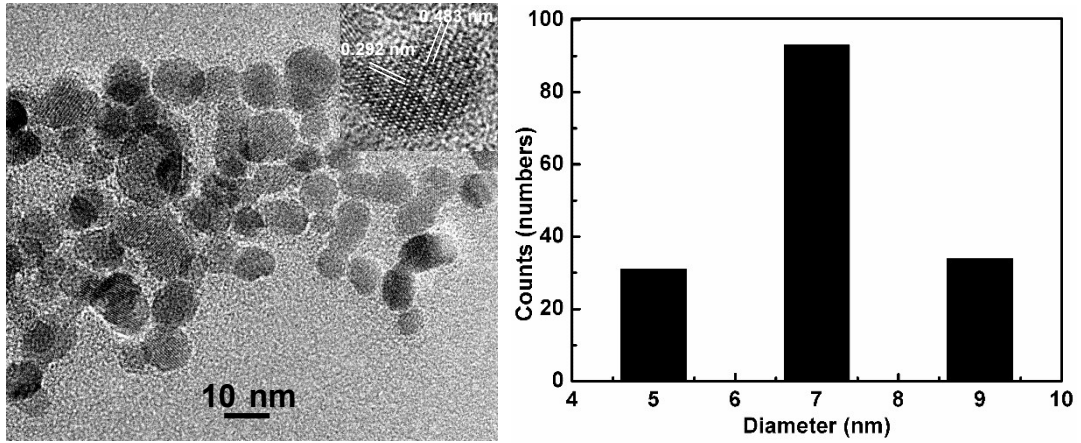

**Figure s5** TEM image and size histogram of highly crystalline  $\text{Fe}_3\text{O}_4$  nanoparticles giving a mean diameter of  $7.1 \pm 1.2$  nm. Lattice distances of 0.483 nm and 0.292 nm represent (111) and (220) planes of magnetite spinel  $\text{Fe}_3\text{O}_4$ .
